# Supplementary material
Source: PubMed Central journal article supplement (PMC3109731)
Supplement: NIHMS294403-supplement-1.pdf [file NIHMS294403-supplement-1.pdf]

### Supplemental Table A. Drug Dose, Chiral and Racemic Fluoxetine Levels

FLX = Fluoxetine NorFLX = Norfluoxetine N/A = Not Available \* racemic levels only chiral levels not available

| ID# | Drug     | Week 20   | Plasma Level (ng/ml) | Week 30   | Plasma Level (ng/ml) | Week 36   | Plasma Level (ng/ml) | Delivery maternal | Plasma Level (ng/ml) | PP 12wks  | Plasma Level (ng/ml) |
|-----|----------|-----------|----------------------|-----------|----------------------|-----------|----------------------|-------------------|----------------------|-----------|----------------------|
|     |          | Dose (mg) |                      | Dose (mg) |                      | Dose (mg) |                      | Dose (mg)         |                      | Dose (mg) |                      |
| 1   | S-FLX    | 20        | 18.9                 | 20        | <5                   | 20        | <5                   | 20                | N/A                  | 20        | 26.4                 |
|     | R-FLX    |           | 25.9                 |           | 0                    |           | 0                    |                   | N/A                  |           | 19                   |
|     | S-NorFLX |           | 44.6                 |           | 6.3                  |           | 23.4                 |                   | N/A                  |           | 37.2                 |
|     | R-NorFLX |           | 32.4                 |           | <5                   |           | 14.6                 |                   | N/A                  |           | 26.8                 |
| 2   | S-FLX    | 40        | 131                  | 40        | 122                  | 40        | 94.8                 | 40                | N/A                  | 40        | 216                  |
|     | R-FLX    |           | 40.9                 |           | 51.1                 |           | 37.5                 |                   | N/A                  |           | 49.1                 |
|     | S-NorFLX |           | 204                  |           | 192                  |           | 179                  |                   | N/A                  |           | 177                  |
|     | R-NorFLX |           | 90.2                 |           | 84.5                 |           | 75.9                 |                   | N/A                  |           | 94.9                 |
| 3   | FLX      | 20        | 140                  | 30        | 250                  | 40        | 296                  | 40                | 290                  | N/A       | N/A                  |
|     | NorFLX   |           | 36                   |           | 60                   |           | 71                   |                   | 62                   |           | N/A                  |
| 4   | FLX      | 30        | 304                  | 60        | 528                  | N/A       | N/A                  | N/A               | N/A                  | N/A       | N/A                  |
|     | NorFLX   |           | 100                  |           | 154                  |           | N/A                  |                   | N/A                  |           | N/A                  |
| 5   | FLX      | 40        | 105                  | 40        | 104                  | 50        | 93                   | N/A               | N/A                  | N/A       | N/A                  |
|     | NorFLX   |           | 181                  |           | 203                  |           | 202                  |                   | N/A                  |           | N/A                  |
| 6   | FLX      | N/A       | N/A                  | 20        | 101                  | 40        | 165                  | 10                | 5                    | 40        | 325                  |
|     | NorFLX   |           | N/A                  |           | 126                  |           | 168                  |                   | 30.9                 |           | 207                  |
| 7   | FLX      | 20        | 55                   | 20        | 51                   | 20        | 35                   | 20                | 12                   | 20        | 10                   |
|     | NorFLX   |           | 108                  |           | 105                  |           | 91                   |                   | 52                   |           | 44                   |
| 8   | S-FLX    | 10        | 7.5                  | 15        | 16.3                 | 15        | 0                    | N/A               | N/A                  | N/A       | N/A                  |
|     | R-FLX    |           | 7.6                  |           | 13.0                 |           | 0                    |                   | N/A                  |           | N/A                  |
|     | S-NorFLX |           | 41.8                 |           | 64.4                 |           | 15.9                 |                   | N/A                  |           | N/A                  |
|     | R-NorFLX |           | 24.3                 |           | 33.7                 |           | 11                   |                   | N/A                  |           | N/A                  |
| 9   | S-FLX    | 40        | 37.1                 | 40        | 59.9                 | 30        | 20                   | 0                 | N/A                  | N/A       | N/A                  |
|     | R-FLX    |           | 20                   |           | 17.3                 |           | 0                    |                   | N/A                  |           | N/A                  |
|     | S-NorFLX |           | 78.8                 |           | 106                  |           | 91.0                 |                   | N/A                  |           | N/A                  |
|     | R-NorFLX |           | 21                   |           | 18.7                 |           | 0                    |                   | N/A                  |           | N/A                  |
| 10  | S-FLX    | 80        | 422                  | 80        | 329                  | N/A       | N/A                  | 80                | N/A                  | 80        | 428                  |
|     | R-FLX    |           | 69.8                 |           | 86.1                 |           | N/A                  |                   | N/A                  |           | 70.2                 |
|     | S-NorFLX |           | 239                  |           | 252                  |           | N/A                  |                   | N/A                  |           | 202                  |
|     | R-NorFLX |           | 66                   |           | 68.3                 |           | N/A                  |                   | N/A                  |           | 53.5                 |
| 11  | S-FLX    | 40        | 27.2                 | 40        | 14                   | 50        | 11                   | 40                | (29)*                | N/A       | N/A                  |
|     | R-FLX    |           | 10                   |           | 8.7                  |           | 6.3                  |                   |                      |           | N/A                  |
|     | S-NorFLX |           | 47.6                 |           | 38.4                 |           | 29.7                 |                   | (52)*                |           | N/A                  |
|     | R-NorFLX |           | 15.3                 |           | 9.1                  |           | 6.6                  |                   |                      |           | N/A                  |
| 12  | S-FLX    | 40        | 282                  | 40        | 246                  | 40        | 428                  | N/A               | N/A                  | 80        | 610                  |
|     | R-FLX    |           | 79                   |           | 55                   |           | 149                  |                   | N/A                  |           | 159                  |
|     | S-NorFLX |           | 227                  |           | 232                  |           | 501                  |                   | N/A                  |           | 244                  |
|     | R-NorFLX |           | 77                   |           | 80                   |           | 369                  |                   | N/A                  |           | 159                  |
| 13  | FLX      | 20        | 47                   | 30        | 74                   | 40        | 138                  | N/A               | N/A                  | N/A       | N/A                  |
|     | NorFLX   |           | 69                   |           | 92                   |           | 115                  |                   | N/A                  |           | N/A                  |
| 14  | FLX      | 20        | 70                   | 30        | 176                  | 40        | 275                  | N/A               | N/A                  | N/A       | N/A                  |
|     | NorFLX   |           | 110                  |           | 184                  |           | 253                  |                   | N/A                  |           | N/A                  |
| 15  | FLX      | 20        | 49                   | 20        | 59                   | 30        | 107                  | N/A               | N/A                  | N/A       | N/A                  |
|     | NorFLX   |           | 113                  |           | 149                  |           | 223                  |                   | N/A                  |           | N/A                  |
| 16  | S-FLX    | 20        | 45                   | 20        | 39                   | 20        | 39                   | N/A               | N/A                  | 10        | 51                   |
|     | R-FLX    |           | 31                   |           | 18                   |           | 21                   |                   | N/A                  |           | 19                   |
|     | S-NorFLX |           | 60                   |           | 71                   |           | 74                   |                   | N/A                  |           | 68                   |
|     | R-NorFLX |           | 39                   |           | 31                   |           | 29                   |                   | N/A                  |           | 31                   |
| 17  | S-FLX    | 40        | 238                  | 50        | 327                  | 50        | 274                  | N/A               | N/A                  | 50        | 470                  |
|     | R-FLX    |           | 28                   |           | 53                   |           | 18                   |                   | N/A                  |           | 50                   |
|     | S-NorFLX |           | 53                   |           | 56                   |           | 62                   |                   | N/A                  |           | 112                  |
|     | R-NorFLX |           | 52                   |           | 75                   |           | 61                   |                   | N/A                  |           | 106                  |
